# Supplementary material for: User-testing guidelines to improve the safety of intravenous medicines administration: a randomised in situ simulation study
Source: PubMed Central journal article supplement (PMC7788229; doi:10.1136/bmjqs-2020-010884), 2020-06-30
Supplement: bmjqs-2020-010884supp003.pdf [file bmjqs-2020-010884supp003.pdf]

**User-testing guidelines to improve the safety of intravenous medicines administration: a randomised in-situ simulation study**

**Supplementary file 1**

**Current and user tested Injectable Medicines Guide provided to the two groups of participants**

On the following pages, the current guidelines are presented first, followed by the user tested guidelines.

## Intravenous - ADULT

## Bathicillin

### MEDICINE NAME:

Bathicillin

### TRADE NAME(S):

B-Cil®

### PRESENTATION OF MEDICINE:

Vials containing 400mg bathicillin powder for reconstitution.<sup>(1)(5)</sup>

### METHOD OF ADMINISTRATION

**IV infusion only:** Dilute and give over 1-3 hours (maximum rate 3mg/kg/hour).<sup>(1)</sup>

### INSTRUCTIONS FOR RECONSTITUTION

Displacement value for bathicillin powder: 400mg displaces 0.5mL.<sup>(1)</sup>

Taking into account the displacement value reconstitute with 9.5mL of water for injections or sodium chloride 0.9% to obtain a 40mg in 1mL solution.

Gently swirl to ensure the powder has completely dissolved and no particulates are visible. DO NOT SHAKE.<sup>(1)</sup>

Requires further dilution before administration.<sup>(1)</sup>

### INSTRUCTIONS FOR DILUTION AND SUITABLE DILUENT

Dilute the 40mg in 1mL reconstituted solution with sodium chloride 0.9% or glucose 5% to give a final concentration of 0.5mg (500micrograms) to 5mg in 1mL.<sup>(1)</sup>

### FLUSHING:

Flush with sodium chloride 0.9% or glucose 5%

### ADVERSE EFFECTS WHICH MAY BE CAUSED BY INJECTABLE ADMINISTRATION AND SUGGESTED MONITORING:

Flushing and nausea are the most common infusion-related reactions - consider stopping treatment if severe.<sup>(1)</sup>

Anaphylactoid type reactions (including flushing, fever, sweating, tachycardia, chest tightness, dyspnoea, faintness, nausea, pruritus, rash), visual disturbances, peripheral oedema, rash, pyrexia, headache, abdominal pain and vomiting.<sup>(1)</sup>

### EXTRAVASATION:

Manufacturer has no information.<sup>(9)</sup>

### COMPATIBILITY INFORMATION USEFUL IN CLINICAL PRACTICE:

Do not infuse with any other medicines.

**Compatible infusions fluids:** The reconstituted solution can be diluted with sodium chloride 0.9%, glucose 5%, compound sodium lactate (Hartmann's solution), glucose 5% and lactated Ringer's solution, glucose 5% and sodium chloride 0.45%, 20mmol potassium chloride in glucose 5%, sodium chloride 0.45%, and 5% glucose in 0.9% sodium chloride.<sup>(1)</sup>

### OTHER COMMENTS:

1. Bathicillin has been associated with QT interval prolongation.<sup>(1)</sup>
2. Electrolyte disturbances such as hypokalaemia, hypomagnesemia and hypocalcaemia should be monitored and corrected if necessary prior to initiation and during bathicillin therapy.<sup>(1)</sup>
3. In patients with moderate to severe renal dysfunction (e-GFR<50mL/min), accumulation of the intravenous vehicle sulfobutylether beta cyclodextrin sodium occurs. These patients should be given oral bathicillin unless a risk benefit assessment justifies the use of intravenous product.<sup>(1)</sup>
4. Patients receiving bathicillin must be carefully monitored for hepatic toxicity.<sup>(1)</sup>

### SPECIAL HANDLING PRECAUTIONS:

Avoid handling if pregnant, planning pregnancy or breastfeeding. Teratogenic in rats.<sup>(10)</sup>

### LATEX STATUS:

Pfizer: Natural rubber latex is not used as a material in the manufacture of this product or in the container or packaging.<sup>(9a)</sup> October 2015

Teva: Natural rubber latex is not used as a material in the manufacture of this product or in the container or packaging.<sup>(9b)</sup> September 2016

Panpharma: Natural rubber latex is not used as a material in the manufacture of this product or in the container or packaging.<sup>(9c)</sup> August 2016

### SODIUM CONTENT (mmol):

B-Cil®: 9.5mmol per vial.<sup>(9a)</sup>

Teva and Panpharma products are free from sodium.<sup>(9b-c)</sup>

### OSMOLARITY / OSMOLALITY:

B-Cil®: Reconstituted solution approximately 507mOsmol/L.<sup>(9a)</sup>

Teva: 210mOsm/kg.<sup>(9b)</sup>

Panpharma: No information.<sup>(9c)</sup>

### pH:

B-Cil®: Undiluted solution 5.5 to 7.5.<sup>(9a)</sup>

Teva: 6.1.<sup>(9b)</sup>

Panpharma: No information.<sup>(9c)</sup>

### PRODUCT RISK FACTORS:

Click the monograph heading or the  icon for the key to the risk factors represented in the pictogram.

Risk factors for bathicillin infusion 0.5-5mg/mL: Therapeutic risk; Use of concentrate; Complex calculation; Complex preparation; Reconstitute vial; Use of multiple and part container;.

**1 2 3 4 5 6 7** TOTAL RISK FACTORS: 7 OVERALL RISK RATING: Red

### CURRENT SUPPLIERS:

#### Actavis UK Limited

This product was not available when the monograph was prepared  
SPC for Bathicillin Actavis 400mg Powder for Solution for Infusion  
PIL for Bathicillin 400mg Powder for Solution for Infusion

#### Panpharma UK Ltd

Supplies Xellia Pharmaceuticals product  
SPC for Bathicillin 400mg Powder for Solution for Infusion  
PIL for Bathicillin 400mg Powder for Solution for Infusion

#### Pfizer Limited

Trade names: B-CIL  
SPC for B-CIL 50 mg and 400mg film-coated tablets, B-CIL 400mg powder for solution for infusion, B-CIL 40 mg/ml powder for oral suspension  
SPC for Bathicillin 400mg Powder Solution Infusion  
PIL for B-CIL 400mg powder for solution for infusion  
PIL for B-CIL 400mg powder and solvent for solution for infusion  
PIL for Bathicillin 400mg Powder Solution Infusion

#### Teva UK Limited

PIL Bathicillin Teva 400mg powder for solution for infusion  
SPC Bathicillin Teva 400mg Powder for Solution for Infusion

### DELETED SUPPLIERS:

### REFERENCES:

1. Summary of Product Characteristics
  - a) B-Cil®, Pfizer. Last updated 06/2016
  - b) Bathicillin, Panpharma. Last updated 06/2015
  - c) Bathicillin, Pfizer. Last updated 03/2014
  - d) Bathicillin, Teva UK Ltd. Last updated 25/02/2016
2. Martindale "The Complete Drug Reference" accessed via www.thomsonhc.com on 30/08/2013
3. American Hospital Formulary Service Drug Information 2011
4. ASHP "Handbook on Injectable Drugs" 17th Edition pg 1150
5. British National Formulary No. 70, September 2015 pg 521 and 522
6. British National Formulary for Children 2015-2016 pg 342
  - a) [Evelina London Paediatric Formulary](#)

7. [MHRA guidance for healthcare professions on using and managing infusion systems](#)
  - a) [Specimen High Risk Injectable Medicines List – November 2016](#)
8. [Development of the UK Vessel Health and Preservation \(VHP\) framework: a multi-organisational collaborative: 2016](#)
9. a) Drug company name: Pfizer. Date contacted: October 2015  
b) Drug company name: Teva. Date contacted: September 2016  
c) Drug company name: Panpharma (PL holder Xellia). Date contacted: August 2016
10. Pfizer Material Safety Data Sheet 2007

**Version 8 - T1**

**DATE PUBLISHED:** 19/01/2017

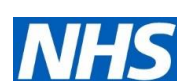

**Injectable Medicines Guide**

Date published: 9<sup>th</sup> November 2018

**Bathicillin (B-Cil®)**

**Intravenous - ADULT**

Click on the icons for background information

**Preparation and Administration Summary**

**Before treatment <sup>(1)</sup>**

Check patient's serum potassium, magnesium and calcium levels. If they are low, they should be corrected. Discuss with the prescriber

**Presentation of medicine <sup>(1)(5)</sup>**

Vials containing 400 mg bathicillin powder for reconstitution

**Method of administration <sup>(1)</sup>**

Only give by IV infusion after reconstitution and further dilution

**Preparation <sup>(1)(10)</sup>**

Do not handle bathicillin if pregnant, planning pregnancy or breastfeeding.

1. Add 9.5 mL of water for injections or sodium chloride 0.9% to each vial. **This makes 10 mL containing 400 mg bathicillin in each vial**
  - Do not shake – gently swirl to ensure the powder has completely dissolved and no particles are visible
2. Calculate the volume you need of this reconstituted solution:

$$\text{Volume needed (mL)} = \frac{\text{Prescribed dose (mg)} \times 10 \text{ mL}}{400 \text{ mg}}$$

3. Add this volume to a bag of sodium chloride 0.9% or glucose 5%:
  - **If bathicillin dose 120-280 mg:** add to 50 mL bag
  - **If bathicillin dose 281-570 mg:** add to 100 mL bag
  - If these dilutions are not suitable, dilute the required dose to give a final concentration of 0.5-5 mg bathicillin in 1 mL
  - Remember to add the volume of reconstituted solution to the volume of diluent when doing this calculation

**Administration <sup>(1)</sup>**

Flush with sodium chloride 0.9% or glucose 5%

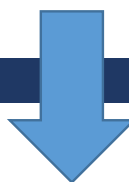

1. Give by IV infusion
2. Use the table link or calculation below to find the length of the infusion:
  - a) [Click on this link for a table](#) showing the length of infusion for different doses and patient weights

**OR**

- b) Calculate the length of the infusion using the following equation:

$$\text{Length of infusion (hours)} = \frac{\text{Dose (mg)}}{3 \times \text{Patient weight (kg)}}$$

**Compatibility <sup>(1)</sup>**

**Do not infuse with any other medicines**

The reconstituted solution can be diluted with:

- Sodium chloride 0.9%
- Glucose 5%
- Glucose 5% and lactated Ringer's solution
- Glucose 5% in sodium chloride 0.45%
- Glucose 5% in sodium chloride 0.9%
- Hartmann's solution (compound sodium lactate)
- 20 mmol potassium chloride in glucose 5%
- Sodium chloride 0.45%

**Adverse effects and monitoring <sup>(1)</sup>**

These adverse effects may occur during or shortly after IV administration:

- Flushing and nausea – if severe, consider stopping treatment
- Anaphylaxis-like reactions – including fever, sweating, tachycardia, chest tightness, dyspnoea, faintness, pruritus, rash
- Visual disturbances
- Peripheral oedema
- Pyrexia
- Headache
- Abdominal pain
- Vomiting

**Extravasation <sup>(9)</sup>**

Manufacturer has no information

**Detailed Information**

**Other comments <sup>(1)</sup>**

- Bathicillin may cause QT interval prolongation
- In patients with eGFR <50mL/min, a cyclodextrin excipient can accumulate. Give these patients oral bathicillin unless a risk benefit assessment justifies the use of IV route.
- Carefully monitor patients receiving bathicillin for hepatic toxicity

**Latex content <sup>(9a-c)</sup>**

- **B-Cil (Pfizer):** Natural rubber latex is not used as a material in the manufacture of this product or in the container or packaging. October 2015
- **Teva:** Natural rubber latex is not used as a material in the manufacture of this product or in the container or packaging. September 2016
- **Panpharma:** Natural rubber latex is not used as a material in the manufacture of this product or in the container or packaging. August 2016

### Sodium content <sup>(9a-c)</sup> ⓘ

- **B-Cil (Pfizer):** 9.5 mmol per vial
- **Teva and Panpharma:** free from sodium

### pH <sup>(9a-c)</sup> ⓘ

- **B-Cil (Pfizer):** undiluted solution pH 5.5 to 7.5
- **Teva:** pH 6.1
- **Panpharma:** no information

### Osmolarity / osmolality <sup>(9a-c)</sup> ⓘ

- **B-Cil (Pfizer):** reconstituted solution is approximately 507 mOsmol/L
- **Teva:** 210 mOsm/kg
- **Panpharma:** no information

### Product risk factors ⓘ

Risk assessment of a common preparation (as required by NPSA Patient Safety Alert 20)

**Risk factors for bathicillin infusion 0.5-5mg/mL:** Therapeutic risk; Use of concentrate; Complex calculation; Complex preparation; Reconstitute vial; Use of multiple and part container.

**1 2 3 4 5 6 7** TOTAL RISK FACTORS: 7 OVERALL RISK RATING: Red

### Current suppliers ⓘ

#### Actavis UK Limited

This product was not available when the monograph was prepared  
SPC for Bathicillin Actavis 400 mg Powder for Solution for Infusion  
PIL for Bathicillin 400 mg Powder for Solution for Infusion

#### Panpharma UK Ltd

Supplies Xellia Pharmaceuticals product  
SPC for Bathicillin 400 mg Powder for Solution for Infusion  
PIL for Bathicillin 400 mg Powder for Solution for Infusion

#### Pfizer Limited

Trade names: B-CIL  
SPC for B-CIL 50 mg and 400 mg film-coated tablets, B-CIL 400 mg powder for solution for infusion, B-CIL 40 mg/ml powder for oral suspension  
SPC for Bathicillin 400 mg Powder Solution Infusion  
PIL for B-CIL 400 mg powder for solution for infusion  
PIL for B-CIL 400 mg powder and solvent for solution for infusion  
PIL for Bathicillin 400 mg Powder Solution Infusion

#### Teva UK Limited

PIL Bathicillin Teva 400 mg powder for solution for infusion  
SPC Bathicillin Teva 400 mg Powder for Solution for Infusion

### References

1. Summary of Product Characteristics
  - a) B-Cil®, Pfizer. Last updated 06/2016
  - b) Bathicillin, Panpharma. Last updated 06/2015
  - c) Bathicillin, Pfizer. Last updated 03/2014
  - d) Bathicillin, Teva UK Ltd. Last updated 25/02/2016
2. Martindale "The Complete Drug Reference" accessed via www.thomsonhc.com on 30/08/2013
3. American Hospital Formulary Service Drug Information 2011
4. ASHP 'Handbook on Injectable Drugs' 17th Edition pg 1150
5. British National Formulary No. 70, September 2015 pg 521 and 522
6. British National Formulary for Children 2015-2016 pg 342
  - a) [Evelina London Paediatric Formulary](#)
7. [MHRA guidance for healthcare professions on using and managing infusion systems](#)
  - a) [Specimen High Risk Injectable Medicines List – November 2016](#)
8. [Development of the UK Vessel Health and Preservation \(VHP\) framework: a multi-organisational collaborative; 2016](#)
9.
  - a) Drug company name: Pfizer. Date contacted: October 2015
  - b) Drug company name: Teva. Date contacted: September 2016
  - c) Drug company name: Panpharma (PL holder Xellia). Date contacted: August 2016
10. Pfizer Material Safety Data Sheet 2007

### Version MDJ4

**Bathicillin  
IntraVENOUS – Adult**

**Version 2**

Maximum bathicillin dose which can be infused in 1 hour, 80 minutes and 2 hours for patients of different weights:

| Weight (kg) | Length of infusion                                           |            |         |
|-------------|--------------------------------------------------------------|------------|---------|
|             | 1 hour                                                       | 80 minutes | 2 hours |
|             | Maximum bathicillin dose which can be given in infusion time |            |         |
| 40          | 120 mg                                                       | 160 mg     | 240 mg  |
| 50          | 150 mg                                                       | 400 mg     | 300 mg  |
| 60          | 180 mg                                                       | 240 mg     | 360 mg  |
| 70          | 210 mg                                                       | 280 mg     | 420 mg  |
| 80          | 240 mg                                                       | 320 mg     | 480 mg  |
| 90          | 270 mg                                                       | 360 mg     | 540 mg  |
| 100         | 300 mg                                                       | 400 mg     | 600 mg  |
| 110         | 330 mg                                                       | 440 mg     | 660 mg  |
| 120         | 360 mg                                                       | 480 mg     | 720 mg  |
| 130         | 390 mg                                                       | 520 mg     | 780 mg  |
| 140         | 420 mg                                                       | 560 mg     | 840 mg  |
