# Supplementary material for: User-testing guidelines to improve the safety of intravenous medicines administration: a randomised in situ simulation study
Source: BMJ Qual Saf. 2020 Jun 30;30(1):17–26. doi: 10.1136/bmjqs-2020-010884 (PMC7788229; doi:10.1136/bmjqs-2020-010884)
Supplement: Supplementary data [file bmjqs-2020-010884supp002.pdf]

**User-testing guidelines to improve the safety of intravenous medicines  
administration: a randomised in-situ simulation study**

**Supplementary file 3**

**Additional Tables, Figures and Data**

*Table 4: Definitions of error types and categorisation as “IMG-related errors” or “non-IMG-related errors”*

| Error code                                                                                          | Error type                            | Definition                                                                                                                                                                                                                                     |
|-----------------------------------------------------------------------------------------------------|---------------------------------------|------------------------------------------------------------------------------------------------------------------------------------------------------------------------------------------------------------------------------------------------|
| IMG-related errors – an error in a process that required use of information from the IMG            |                                       |                                                                                                                                                                                                                                                |
| I1                                                                                                  | Wrong reconstituting fluid            | The dose is reconstituted with a different fluid to that specified in the IMG guidelines                                                                                                                                                       |
| I2                                                                                                  | Wrong reconstituting fluid volume     | The dose is reconstituted with a volume of fluid which differs from that specified in the IMG guidelines by $\geq 10\%$                                                                                                                        |
| I3                                                                                                  | Dose discrepancy                      | The administered dose differs from the prescribed dose by $\geq 5\%$ <sup>a</sup>                                                                                                                                                              |
| I4                                                                                                  | Wrong diluent                         | The dose is infused in a different diluent to that specified in the IMG guidelines                                                                                                                                                             |
| I5                                                                                                  | Wrong diluent volume                  | The dose is infused in a different volume of diluent to that specified in the IMG guidelines                                                                                                                                                   |
| I6                                                                                                  | Incorrect technique (IMG-related)     | The dose is prepared or administered in a way that does not meet the requirements specified by the IMG guidelines, e.g. the vial is shaken when the guidelines specify “do not shake”.                                                         |
| I7                                                                                                  | Wrong route                           | The dose is administered via a different route to that specified on the medication order                                                                                                                                                       |
| I8                                                                                                  | Flush error                           | The intravenous cannula is not flushed in accordance with hospital policy before administration of the dose. (Any requirements for a flush after administration were not relevant, as the infusion was not observed for its entire duration).  |
| I9                                                                                                  | Rate discrepancy                      | The dose is administered at a rate that differs from that specified in the IMG guidelines by $\geq 10\%$                                                                                                                                       |
| I10                                                                                                 | Infusion expiry error                 | An infusion is labelled with an expiry date and time that is not in accordance with the IMG guidelines                                                                                                                                         |
| I11                                                                                                 | Other IMG related error               | Any IMG related error which does not fit one of the above categories, including the participant not being sufficiently confident to finish the simulation without assistance from a colleague (included in analysis as delayed administration) |
| Non-IMG-related errors – an error in a process that did not require use of information from the IMG |                                       |                                                                                                                                                                                                                                                |
| N1                                                                                                  | Wrong medication                      | A different medication to that specified on the medication order is administered                                                                                                                                                               |
| N2                                                                                                  | Incorrect technique (non-IMG related) | The dose is prepared or administered in a way that does not meet the requirements of hospital policy, e.g. incorrect mixing technique, air in the syringe, where these details are not specified in the IMG guidelines.                        |
| N3                                                                                                  | Non-aseptic technique                 | Breach of the aseptic technique policy of the hospital during the preparation or administration of the dose (e.g. hands not washed, vials/additive ports not swapped with an alcohol wipe)                                                     |
| N4                                                                                                  | Expired ingredients                   | Use of expired medicine, reconstituting fluid, diluent or flush.                                                                                                                                                                               |
| N5                                                                                                  | Other non-IMG related error           | Any non-IMG related error which does not fit the above categories                                                                                                                                                                              |

<sup>a</sup>A figure of 5% was chosen to ensure that an error is recorded when the participant does not account for the displacement value, a common error during the previous user-testing study. A threshold of 5% has been used in a number of previous studies.

IMG = Injectable Medicines Guide

Figure 3: Kaplan-Meier Curve showing the times taken to prepare and administer the dose of voriconazole in each group

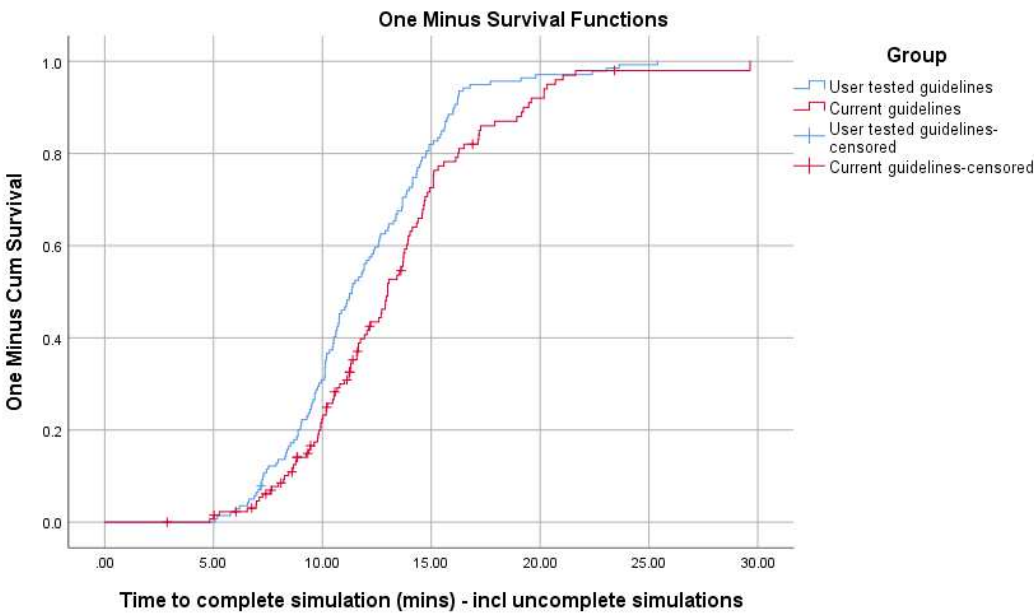

### Psychometric Properties of the Modified Provider Decision Process Assessment Instrument (mPDPAI)

Item homogeneity of the mPDPAI was evaluated by calculating Spearman's rank correlation coefficients between each item and a revised mDCS calculated by removing that item from the total score:

*Table 5: Psychometric properties of the modified provider decision process assessment instrument (mPDPAI)*

| Item removed from the mPDPAI                                                                                          | Spearman's rank correlation coefficient |
|-----------------------------------------------------------------------------------------------------------------------|-----------------------------------------|
| It was hard to decide how to make and give bathicillin                                                                | 0.85                                    |
| I was unsure how to make and give bathicillin                                                                         | 0.83                                    |
| It was clear how to make and give bathicillin                                                                         | 0.83                                    |
| When deciding how to make and give bathicillin, I felt I did not know enough about the alternative ways of doing this | 0.63                                    |
| I had trouble deciding how to make and give bathicillin because important information was not available               | 0.79                                    |
| It was easy to identify all the information needed to make and give bathicillin                                       | 0.86                                    |
| I am satisfied with how I made and gave bathicillin                                                                   | 0.75                                    |
| I am satisfied that the process used to decide how to make and give bathicillin was as good as it could be            | 0.80                                    |

Inter-item reliability of the mPDPAI was confirmed by a Cronbach's alpha of 0.95.

Construct validity of the mPDPAI was confirmed by the strong negative correlation coefficients between the mDCS and participants' self-rating of quality (-0.78), and the mDCS and participants' rating of their feelings about the process (-0.82). A weak positive correlation coefficient was found between mDCS score and time to complete the simulation (0.23). Mixed effects logistic regression with any IMG-related error as the dependent variable, NHS trust as a random effect, and mDCS and other participants characteristics as fixed-effect covariates found an mDCS odds ratio of

1.12 (95% confidence interval 1.08-1.17), confirming that participants with a higher mDCS were more likely to make an IMG-related error.
